# Supplementary material for: Oxide ceramic electrolytes for all-solid-state lithium batteries – cost-cutting cell design and environmental impact
Source: Royal Society of Chemistry journal article supplement (doi:10.1039/d2gc03368b), 2022-12-08
Supplement: d2gc03368b1.pdf [file d2gc03368b1.pdf]

## Supplementary Material

The supporting information includes the life cycle inventories (LCIs) of the model cell (Table S 1), its components (Table S 2, Table S 4, Table S 5, Table S 9), and materials (Table S 3, Table S 6, Table S 7, Table S 8, Table S 10 - Table S 15) as modeled in the GaBi software. In Table S 16 - Table S 23, the LCIs of the precursor materials of LATP and LLZO are listed: aluminium nitrate nonahydrate  $[\text{Al}(\text{NO}_3)_3 \cdot 9 \text{H}_2\text{O}]$ , lithium nitrate ( $\text{LiNO}_3$ ), lanthanum nitrate  $[\text{La}(\text{NO}_3)_3 \cdot 6 \text{H}_2\text{O}]$ , zirconium oxynitrate  $[\text{ZrO}(\text{NO}_3)_2 \cdot 6 \text{H}_2\text{O}]$ , zirconium tetrachloride  $[\text{ZrCl}_4]$ , ammonium dihydrogen phosphate  $[(\text{NH}_4)_2\text{H}_2\text{PO}_4]$ , lithium acetate  $[\text{Li}(\text{CH}_3\text{COO}) \cdot 2 \text{H}_2\text{O}]$ , and titanium isopropoxide  $[\text{Ti}[\text{OCH}(\text{CH}_3)_2]_4]$ .

Energy is given as net calorific value unless otherwise stated. In addition, the origin of the process data is marked (e.g., Sphera,ecoinvent 3.7.1, PlasticsEurope, Nickel Institute, own process model).

In Chapter 10, a comparison of LATP and LLZO with the standard liquid electrolyte LiPF<sub>6</sub> (in EC/DMC) is carried out.

### 1. LCI of pouch cell

The pouch cell, measuring 5 cm \* 5 cm, has a capacity of 6.15 mAh/cm<sup>2</sup> and an energy density of 394.4 Wh/kg. All materials for the layers have been calculated with 3% offcut. Argon and electricity input are required for assembly in the glovebox. Energy requirements for material supply is included in their data sets.

Table S 1. LCI of one pouch, 5 x 5 cm<sup>2</sup>

| Flows                                                                          | Quantities              | Amount          | Unit        |
|--------------------------------------------------------------------------------|-------------------------|-----------------|-------------|
| <i>Input</i>                                                                   |                         |                 |             |
| DE: Aluminium foil Sphera, 10 μm                                               | Mass                    | 6.95E-05        | kg          |
| EU-28: Copper sheet (A1-A3) Sphera, 10 μm                                      | Mass                    | 2.30E-04        | kg          |
| DE: Lithium anode, 10 μm, own process model                                    | Mass                    | 1.38E-05        | kg          |
| DE: Electrolyte (LLZO), 10 μm, own process model                               | Area                    | 2.58E-03        | sqm         |
| DE: Mixed cathode (LATP/NMC 622, weight ratio 20:80) 100 μm, own process model | Area                    | 2.58E-03        | sqm         |
| DE: Carrier foil (PET) 100 μm, own process model                               | Area                    | 2.58E-03        | sqm         |
| DE: Argon (gaseous) Sphera                                                     | Mass                    | 7.14E-04        | kg          |
| DE: Electricity grid mix Sphera                                                | Energy                  | 1.01E-01        | MJ          |
| <i>Output</i>                                                                  |                         |                 |             |
| <b>Pouch cell</b>                                                              | <b>Number of pieces</b> | <b>1.00E+00</b> | <b>Pcs.</b> |

## 2. LCI of lithium anode

The inventory of the 10  $\mu\text{m}$  lithium metal anode involves the processes shown in Table S 2 and Table S 3. The inventory of lithium foil production with a thickness of 35  $\mu\text{m}$  showing in Table S 3 is taken from Deng, Yelin, Li, Jianyang [1]. For its use in the inventory of the pouch cell (Table S 1), only the mass was linearly reduced to 10  $\mu\text{m}$ . This means that the energy requirement for cold rolling is underestimated, since the thickness of the foil in Deng is 35  $\mu\text{m}$  and not 10  $\mu\text{m}$  as we assumed.

*Table S 2. LCI of lithium anode*

| Flows                                                                   | Quantities  | Amount          | Unit      |
|-------------------------------------------------------------------------|-------------|-----------------|-----------|
| <i>Input</i>                                                            |             |                 |           |
| DE: Lithium foil, 35 $\mu\text{m}$ , adapted according to [1]           | Mass        | 1.00E+00        | kg        |
| RER: transport, freight, lorry 7.5-16 metric ton, EURO6 ecoinvent 3.7.1 | Transport   | 2.00E-01        | tkm       |
| <i>Output</i>                                                           |             |                 |           |
| <b>DE: Lithium anode</b>                                                | <b>Mass</b> | <b>1.00E+00</b> | <b>kg</b> |

*Table S 3. LCI of lithium foil adapted according to [1]*

| Flows                                                    | Quantities  | Amount          | Unit      |
|----------------------------------------------------------|-------------|-----------------|-----------|
| <i>Input</i>                                             |             |                 |           |
| GLO: market for lithium ecoinvent 3.7.1                  | Mass        | 1.04E+00        | kg        |
| RER: sheet rolling, aluminium ecoinvent 3.7.1            | Mass        | 4.95E+00        | kg        |
| GLO: tetraethyl orthosilicate production ecoinvent 3.7.1 | Mass        | 1.54E-01        | kg        |
| DE: Electricity grid mix Sphera                          | Energy      | 48.5E+00        | MJ        |
| DE: Process steam from natural gas 85% Sphera            | Energy      | 155.8E+00       | MJ        |
| <i>Output</i>                                            |             |                 |           |
| <b>DE: Lithium foil, 35<math>\mu\text{m}</math></b>      | <b>Mass</b> | <b>1.00E+00</b> | <b>kg</b> |
| Sodium silicates [Inorganic emissions to air]            | Mass        | 1.87E-02        | kg        |
| Solid waste [Hazardous waste for disposal]               | Mass        | 3.80E-02        | kg        |

### 3. LCI of carrier foil

The carrier foil is required during tape casting of the electrolyte layer and is subsequently disposed of as waste.

*Table S 4. LCI of carrier foil*

| Flows                                                                                     | Quantities  | Amount          | Unit       |
|-------------------------------------------------------------------------------------------|-------------|-----------------|------------|
| <i>Input</i>                                                                              |             |                 |            |
| DE: Polyethylene terephthalate granulate (PET via DMT) Sphera                             | Mass        | 1.35E-01        | kg         |
| RER: transport, freight, lorry 7.5-16 metric ton, EURO6 ecoinvent 3.7.1                   | Transport   | 2.70E-02        | tkm        |
| <i>Output</i>                                                                             |             |                 |            |
| <b>DE: Carrier foil (PET) 100 µm</b>                                                      | <b>Area</b> | <b>1.00E+00</b> | <b>sqm</b> |
| CH: treatment of waste polyethylene terephthalate, municipal incineration ecoinvent 3.7.1 | Mass        | 1.35E-01        | kg         |

#### 4. LCI of LLZO electrolyte

Table S 5. LCI of LLZO electrolyte

| Flows                                               | Quantities  | Amount          | Unit       |
|-----------------------------------------------------|-------------|-----------------|------------|
| <i>Input</i>                                        |             |                 |            |
| DE: electrolyte slurry, own process model           | Mass        | 4.73E-03        | kg         |
| DE: Electricity grid mix Sphera                     | Energy      | 1.71E-01        | MJ         |
| <i>Output</i>                                       |             |                 |            |
| <b>DE: Electrolyte (LLZO), 10 µm</b>                | <b>Area</b> | <b>5.00E-02</b> | <b>sqm</b> |
| Butanone (methyl ethyl ketone) [Group NMVOC to air] | Mass        | 1.06E-03        | kg         |
| Ethanol [Group NMVOC to air]                        | Mass        | 5.45E-04        | kg         |

Table S 6. LCI of LLZO electrolyte slurry

| Flows                                                                      | Quantities  | Amount          | Unit      |
|----------------------------------------------------------------------------|-------------|-----------------|-----------|
| <i>Input</i>                                                               |             |                 |           |
| DE: LLZO powder, own process model                                         | Mass        | 5.40E-01        | kg        |
| RER: Polyether polyol PlasticsEurope                                       | Mass        | 1.35E-02        | kg        |
| DE: Ethanol (96%) (hydrogenation with nitric acid)<br>Sphera               | Mass        | 1.15E-01        | kg        |
| RER: methyl ethyl ketone production ecoinvent 3.7.1                        | Mass        | 2.23E-01        | kg        |
| EU-28: Triethylene glycol PlasticsEurope                                   | Mass        | 5.40E-02        | kg        |
| RER: vinyl acetate production ecoinvent 3.7.1 <sup>a</sup>                 | Mass        | 5.40E-02        | kg        |
| RER: transport, freight, lorry 7.5-16 metric ton, EURO6<br>ecoinvent 3.7.1 | Transport   | 2.00E-01        | tkm       |
| <i>Output</i>                                                              |             |                 |           |
| <b>DE: Electrolyte slurry</b>                                              | <b>Mass</b> | <b>1.00E+00</b> | <b>kg</b> |

<sup>a</sup> substitute for PVB 98 (polyvinyl butyral)

## 5. LCI of LLZO powder

Table S 7. LCI of LLZO powder produced via solid-state reaction

| Flows                                                                               | Quantities  | Amount          | Unit      |
|-------------------------------------------------------------------------------------|-------------|-----------------|-----------|
| <i>Input</i>                                                                        |             |                 |           |
| GLO: lithium hydroxide productionecoinvent 3.7.1                                    | Mass        | 3.23E-01        | kg        |
| GLO: market for lanthanum oxideecoinvent 3.7.1                                      | Mass        | 5.82E-01        | kg        |
| GLO: market for zirconium oxideecoinvent 3.7.1                                      | Mass        | 2.93E-01        | kg        |
| IAI Area, EU27 & EFTA: market for aluminium oxide, non-metallurgicalecoinvent 3.7.1 | Mass        | 1.21E-02        | kg        |
| DE: Electricity grid mix Sphera                                                     | Energy      | 82.30E+00       | MJ        |
| <i>Output</i>                                                                       |             |                 |           |
| <b>DE: LLZO Electrolyte powder produced via solid-state reaction</b>                | <b>Mass</b> | <b>1.00E+00</b> | <b>kg</b> |

Table S 8. LCI of LLZO powder produced via spray drying

| Flows                                                                                                        | Quantities  | Amount          | Unit      |
|--------------------------------------------------------------------------------------------------------------|-------------|-----------------|-----------|
| <i>Input</i>                                                                                                 |             |                 |           |
| DE: Aluminium nitrate nonahydrate [Al(NO <sub>3</sub> ) <sub>3</sub> *9 H <sub>2</sub> O], own process model | Mass        | 9.01E-02        | kg        |
| DE: Lithium nitrate LiNO <sub>3</sub> , own process model                                                    | Mass        | 5.94E-01        | kg        |
| DE: Lanthannitrat [La(NO <sub>3</sub> ) <sub>3</sub> *6 H <sub>2</sub> O], own process model                 | Mass        | 1.55E+00        | kg        |
| DE: Zirconium oxynitrate [ZrO(NO <sub>3</sub> ) <sub>2</sub> *6 H <sub>2</sub> O], own process model         | Mass        | 8.07E-01        | kg        |
| Europe without Switzerland: market for water, deionisedecoinvent 3.7.1                                       | Mass        | 5.00E+00        | kg        |
| DE: Nitric acid (98%) Sphera                                                                                 | Mass        | 7.82E-03        | kg        |
| DE: Electricity grid mix Sphera                                                                              | Energy      | 51.10E+00       | MJ        |
| <i>Output</i>                                                                                                |             |                 |           |
| <b>DE: LLZO Electrolyte powder produced via spray drying</b>                                                 | <b>Mass</b> | <b>1.00E+00</b> | <b>kg</b> |

## 6. LCI of mixed cathode (LATP/NMC 622)

Table S 9. LCI of mixed cathode

| Flows                                               | Quantities  | Amount          | Unit       |
|-----------------------------------------------------|-------------|-----------------|------------|
| <i>Input</i>                                        |             |                 |            |
| DE: mixed cathode slurry, own process model         | Mass        | 3.89E-02        | kg         |
| DE: Electricity grid mix Sphera                     | Energy      | 4.14E-01        | MJ         |
| <i>Output</i>                                       |             |                 |            |
| <b>DE: Mixed cathode (LATP/NMC 622), 100 µm</b>     | <b>Area</b> | <b>5.00E-02</b> | <b>sqm</b> |
| Butanone (methyl ethyl ketone) [Group NMVOC to air] | Mass        | 8.70E-03        | kg         |
| Ethanol [Group NMVOC to air]                        | Mass        | 4.49E-03        | kg         |

Table S 10. LCI of mixed cathode slurry

| Flows                                                                      | Quantities  | Amount          | Unit      |
|----------------------------------------------------------------------------|-------------|-----------------|-----------|
| <i>Input</i>                                                               |             |                 |           |
| DE: LATP powder, own process model                                         | Mass        | 1.13E-01        | kg        |
| DE: NMC 622 powder according to [2]                                        | Mass        | 4.27E-01        | kg        |
| RER: Polyether polyol PlasticsEurope                                       | Mass        | 1.35E-02        | kg        |
| DE: Ethanol (96%) (hydrogenation with nitric acid)<br>Sphera               | Mass        | 1.15E-01        | kg        |
| RER: methyl ethyl ketone productionecoinvent 3.7.1                         | Mass        | 2.23E-01        | kg        |
| EU-28: Triethylene glycol PlasticsEurope                                   | Mass        | 5.40E-02        | kg        |
| RER: vinyl acetate productionecoinvent 3.7.1 <sup>a</sup>                  | Mass        | 5.40E-02        | kg        |
| RER: transport, freight, lorry 7.5-16 metric ton, EURO6<br>ecoinvent 3.7.1 | Transport   | 2.00E-01        | tkm       |
| <i>Output</i>                                                              |             |                 |           |
| <b>DE: Mixed cathode slurry</b>                                            | <b>Mass</b> | <b>1.00E+00</b> | <b>kg</b> |

<sup>a</sup> substitute for PVB 98 (polyvinyl butyral)

## 7. LCI of LTP powder

Table S 11. LCI of LTP powder produced via solid-state reaction

| Flows                                                                                                    | Quantities  | Amount          | Unit      |
|----------------------------------------------------------------------------------------------------------|-------------|-----------------|-----------|
| <i>Input</i>                                                                                             |             |                 |           |
| IAI Area, EU27 & EFTA: market for aluminium oxide, non-metallurgical ecoinvent 3.7.1                     | Mass        | 3.98E-02        | kg        |
| GLO: lithium carbonate production, from concentrated brine ecoinvent 3.7.1                               | Mass        | 1.25E-01        | kg        |
| DE: Ammonium dihydrogen phosphate [(NH <sub>4</sub> )H <sub>2</sub> PO <sub>4</sub> ], own process model | Mass        | 8.97E-01        | kg        |
| RER: market for titanium dioxide ecoinvent 3.7.1                                                         | Mass        | 3.53E-01        | kg        |
| DE: Electricity grid mix Sphera                                                                          | Energy      | 45.90E+00       | MJ        |
| <i>Output</i>                                                                                            |             |                 |           |
| <b>DE: LTP powder produced via solid-state reaction</b>                                                  | <b>Mass</b> | <b>1.00E+00</b> | <b>kg</b> |
| Carbon dioxide [Inorganic emissions to air]                                                              | Mass        | 7.44E-02        | kg        |
| Water vapour [Inorganic emissions to air]                                                                | Mass        | 4.21E-01        | kg        |
| NOx retained, by selective catalytic reduction <sup>a</sup>                                              | Mass        | 3.59E-01        | kg        |

<sup>a</sup> NOx is not released as an emission, but is converted to nitrogen and water by selective catalytic reduction with ammonia

Table S 12. LCI of LTP powder produced via sol-gel process

| Flows                                                                                                        | Quantities  | Amount          | Unit      |
|--------------------------------------------------------------------------------------------------------------|-------------|-----------------|-----------|
| <i>Input</i>                                                                                                 |             |                 |           |
| DE: Lithium acetate [Li(CH <sub>3</sub> COO)*2 H <sub>2</sub> O], own process model                          | Mass        | 3.46E-01        | kg        |
| DE: Aluminium nitrate nonahydrate [Al(NO <sub>3</sub> ) <sub>3</sub> *9 H <sub>2</sub> O], own process model | Mass        | 2.93E-01        | kg        |
| DE: Titanium isopropoxide [Ti[OCH(CH <sub>3</sub> ) <sub>2</sub> ] <sub>4</sub> ], own process model         | Mass        | 1.26E+00        | kg        |
| DE: Ammonium dihydrogen phosphate [(NH <sub>4</sub> )H <sub>2</sub> PO <sub>4</sub> ], own process model     | Mass        | 8.99E-01        | kg        |
| Europe without Switzerland: market for water, deionised ecoinvent 3.7.1                                      | Mass        | 2.00E+00        | kg        |
| DE: Electricity grid mix Sphera                                                                              | Energy      | 42.10E+00       | MJ        |
| <i>Output</i>                                                                                                |             |                 |           |
| <b>DE: LTP powder produced via sol-gel process</b>                                                           | <b>Mass</b> | <b>1.00E+00</b> | <b>kg</b> |
| Carbon dioxide [Inorganic emissions to air]                                                                  | Mass        | 2.75E+00        | kg        |
| Water vapour [Inorganic emissions to air]                                                                    | Mass        | 3.88E+00        | kg        |
| NOx retained, by selective catalytic reduction <sup>a</sup>                                                  | Mass        | 4.68E-01        | kg        |

<sup>a</sup> NOx is not released as an emission, but is converted to nitrogen and water by selective catalytic reduction with ammonia

## 8. LCI of NMC 622 powder

The quantities of the flows to produce NMC 622 were obtained from [2]. Our LCI was set up with processes fromecoinvent 3.7.1, sphere, Nickel Institute, and Cobalt Development Institute (CDI). A separate process has been developed to produce cobalt sulfate based on the reaction of cobalt with concentrated sulfuric acid (Table S 15).

Table S 13. LCI of NMC 622 according to [2]

| Flows                                                                     | Quantities  | Amount          | Unit      |
|---------------------------------------------------------------------------|-------------|-----------------|-----------|
| <i>Input</i>                                                              |             |                 |           |
| DE: NMC 622 Precursor, own process model according to [2]                 | Mass        | 1.00E+00        | kg        |
| DE: Process steam from natural gas 85% Sphera                             | Energy      | 6.80E+00        | MJ        |
| DE: Oxygen (gaseous) Sphera                                               | Mass        | 4.29E+00        | kg        |
| Europe without Switzerland: market for water, deionisedecoinvent 3.7.1    | Mass        | 3.00E-01        | kg        |
| DE: Electricity grid mix Sphera                                           | Energy      | 36.00E+00       | MJ        |
| GLO: lithium carbonate production, from concentrated brineecoinvent 3.7.1 | Mass        | 4.00E-01        | kg        |
| <i>Output</i>                                                             |             |                 |           |
| <b>NMC 622 [Materials]</b>                                                | <b>Mass</b> | <b>1.00E+00</b> | <b>kg</b> |

Table S 14. LCI of NMC 622 precursor according to [2]

| Flows                                                                                                    | Quantities  | Amount          | Unit           |
|----------------------------------------------------------------------------------------------------------|-------------|-----------------|----------------|
| <i>Input</i>                                                                                             |             |                 |                |
| GLO: Nickel sulphate hexahydrate [NiSO <sub>4</sub> *6 H <sub>2</sub> O] Nickel Institute                | Mass        | 1.00E+00        | kg             |
| DE: Cobalt sulphate [Co(SO) <sub>4</sub> ], own process model                                            | Mass        | 3.00E-01        | kg             |
| GLO: market for manganese sulfateecoinvent 3.7.1                                                         | Mass        | 3.00E-01        | kg             |
| DE: Sodium hydroxide (caustic soda) mix (100%) Sphera                                                    | Mass        | 9.00E-01        | kg             |
| Europe without Switzerland: market for water, deionisedecoinvent 3.7.1                                   | Mass        | 6.00E+02        | kg             |
| DE: market for natural gas, high pressureecoinvent 3.7.1                                                 | Volume      | 1.10E+00        | m <sup>3</sup> |
| DE: Ammonia (NH <sub>3</sub> ) without CO <sub>2</sub> recovery (carbon dioxide emissions to air) Sphera | Mass        | 1.00E-01        | kg             |
| <i>Output</i>                                                                                            |             |                 |                |
| <b>NMC 622 Precursor [Materials]</b>                                                                     | <b>Mass</b> | <b>1.00E+00</b> | <b>kg</b>      |



Table S 15. LCI of cobalt sulphate

| Flows                                                   | Quantities  | Amount          | Unit      |
|---------------------------------------------------------|-------------|-----------------|-----------|
| <i>Input</i>                                            |             |                 |           |
| GLO: Cobalt, refined (metal) CDI                        | Mass        | 3.80E-01        | kg        |
| DE: Sulphuric acid mix (96%) (consumption mix) Sphera   | Mass        | 6.59E-01        | kg        |
| <i>Output</i>                                           |             |                 |           |
| <b>Cobalt sulphate [Co(SO)<sub>4</sub>] [Materials]</b> | <b>Mass</b> | <b>1.00E+00</b> | <b>kg</b> |
| Hydrogen [Inorganic emissions to air]                   | Mass        | 1.30E-02        | kg        |

## 9. LCI of precursors for LLZO and LATP production

Table S 16. LCI of aluminum nitrate nonahydrate ( $Al(NO_3)_3 \cdot 9 H_2O$ )

| Flows                                                                   | Quantities                   | Amount          | Unit      |
|-------------------------------------------------------------------------|------------------------------|-----------------|-----------|
| <i>Input</i>                                                            |                              |                 |           |
| IAI Area, EU27 & EFTA: aluminium hydroxide production ecoinvent 3.7.1   | Mass                         | 2.1E-01         | kg        |
| DE: Process steam from natural gas 85% Sphera                           | Energy                       | 5.96E-01        | MJ        |
| DE: Nitric acid (98%) Sphera                                            | Mass                         | 5.14E-01        | kg        |
| Europe without Switzerland: market for water, deionised ecoinvent 3.7.1 | Mass                         | 2.88E-01        | kg        |
| DE: Electricity grid mix Sphera                                         | Energy (net calorific value) | 5.80E-01        | MJ        |
| Europe without Switzerland: market for tap water ecoinvent 3.7.1        | Mass                         | 5.14E-01        | kg        |
| <i>Output</i>                                                           |                              |                 |           |
| <b>Aluminium nitrate nonahydrate [Materials]</b>                        | <b>Mass</b>                  | <b>1.00E+00</b> | <b>kg</b> |

Table S 17. LCI of lithium nitrate ( $LiNO_3$ )

Lithium nitrate ( $LiNO_3$ ) is prepared by stirring lithium carbonate ( $Li_2CO_3$ ) and nitric acid ( $HNO_3$ ) together at ambient temperature and then adding lithium hydroxide ( $LiOH$ ) to adjust the pH value. The detailed LCI is obtained from literature [1].

| Flows                                                                      | Quantities                   | Amount          | Unit      |
|----------------------------------------------------------------------------|------------------------------|-----------------|-----------|
| <i>Input</i>                                                               |                              |                 |           |
| GLO: lithium hydroxide production ecoinvent 3.7.1                          | Mass                         | 3.30E-02        | kg        |
| DE: Process steam from natural gas 85% Sphera                              | Energy                       | 1.99E+00        | MJ        |
| DE: Nitric acid (98%) Sphera                                               | Mass                         | 9.14E-01        | kg        |
| GLO: lithium carbonate production, from concentrated brine ecoinvent 3.7.1 | Mass                         | 4.84E-01        | kg        |
| DE: Electricity grid mix Sphera                                            | Energy (net calorific value) | 8.82E-01        | MJ        |
| Europe without Switzerland: market for tap water ecoinvent 3.7.1           | Mass                         | 9.14E-01        | kg        |
| <i>Output</i>                                                              |                              |                 |           |
| <b>Lithium nitrate [Materials]</b>                                         | <b>Mass</b>                  | <b>1.00E+00</b> | <b>kg</b> |
| Wastewater [Production residues in life cycle]                             | Mass                         | 9.14E-01        | kg        |
| Carbon dioxide [Inorganic emissions to air]                                | Mass                         | 2.88E-01        | kg        |

Table S 18. LCI of lanthanum nitrate [La(NO<sub>3</sub>)<sub>3</sub>\*6 H<sub>2</sub>O]

| Flows                                                                                  | Quantities                   | Amount          | Unit      |
|----------------------------------------------------------------------------------------|------------------------------|-----------------|-----------|
| <i>Input</i>                                                                           |                              |                 |           |
| GLO: market for lanthanum oxide ecoinvent 3.7.1                                        | Mass                         | 4.29E-01        | kg        |
| Europe without Switzerland: market for water, deionized ecoinvent 3.7.1                | Mass                         | 1.35E-01        | kg        |
| DE: Process steam from natural gas 85% Sphera                                          | Energy                       | 5.90E-01        | MJ        |
| DE: Nitric acid (98%) Sphera                                                           | Mass                         | 5.09E -01       | kg        |
| GLO: lithium carbonate production, from concentrated brine, ecoinvent 3.7.1            | Mass                         | 4.84E-01        | kg        |
| DE: Electricity grid mix Sphera                                                        | Energy (net calorific value) | 6.01E-01        | MJ        |
| Europe without Switzerland: market for tap water ecoinvent 3.7.1                       | Mass                         | 5.09E-01        | kg        |
| <i>Output</i>                                                                          |                              |                 |           |
| <b>Lanthanum nitrate [La(NO<sub>3</sub>)<sub>3</sub>*6 H<sub>2</sub>O] [Materials]</b> | <b>Mass</b>                  | <b>1.00E+00</b> | <b>kg</b> |

Table S 19. LCI of zirconium oxynitrate [ZrO(NO<sub>3</sub>)<sub>2</sub>\*6 H<sub>2</sub>O]

| Flows                                                                                      | Quantities                   | Amount          | Unit      |
|--------------------------------------------------------------------------------------------|------------------------------|-----------------|-----------|
| <i>Input</i>                                                                               |                              |                 |           |
| Zirconium tetrachloride [ZrCl <sub>4</sub> ], own process model                            | Mass                         | 6.87E-01        | kg        |
| Europe without Switzerland: market for water, deionized ecoinvent 3.7.1                    | Mass                         | 3.72E-01        | kg        |
| DE: Process steam from natural gas 85% Sphera                                              | Energy                       | 5.90E-01        | MJ        |
| DE: Nitric acid (98%) Sphera                                                               | Mass                         | 3.79E -01       | kg        |
| DE: Electricity grid mix Sphera                                                            | Energy (net calorific value) | 6.88E-01        | MJ        |
| Europe without Switzerland: market for tap water ecoinvent 3.7.1                           | Mass                         | 3.79E-01        | kg        |
| <i>Output</i>                                                                              |                              |                 |           |
| <b>Zirconium oxynitrate [ZrO(NO<sub>3</sub>)<sub>2</sub>*6 H<sub>2</sub>O] [Materials]</b> | <b>Mass</b>                  | <b>1.00E+00</b> | <b>kg</b> |
| Hydrochloric acid [Waste for recovery]                                                     | Mass                         | 4.30E-01        | kg        |

Table S 20. LCI of zirconium tetrachloride [ZrCl<sub>4</sub>]

| Flows                                                                           | Quantities                   | Amount          | Unit      |
|---------------------------------------------------------------------------------|------------------------------|-----------------|-----------|
| <i>Input</i>                                                                    |                              |                 |           |
| AU: zirconium oxide productionecoinvent 3.7.1                                   | Mass                         | 5.29E-01        | kg        |
| DE: Chlorine mix Sphera                                                         | Mass                         | 6.09E-01        | kg        |
| RER: market group for heat, district or industrial, natural gas,ecoinvent 3.7.1 | Energy                       | 2.10E+00        | MJ        |
| DE: Electricity grid mix Sphera                                                 | Energy (net calorific value) | 5.04E-01        | MJ        |
| DE: Metallurgical coke Sphera                                                   | Mass                         | 1.03E-01        | kg        |
| <i>Output</i>                                                                   |                              |                 |           |
| <b>Zirconium tetrachloride [ZrCl<sub>4</sub>] [Materials]</b>                   | <b>Mass</b>                  | <b>1.00E+00</b> | <b>kg</b> |
| Carbon monoxide [Inorganic emissions to air]                                    | Mass                         | 2.40E-01        | kg        |

Table S 21. LCI of ammonium dihydrogen phosphate [(NH<sub>4</sub>)H<sub>2</sub>PO<sub>4</sub>]

| Flows                                                                                                  | Quantities                   | Amount          | Unit      |
|--------------------------------------------------------------------------------------------------------|------------------------------|-----------------|-----------|
| <i>Input</i>                                                                                           |                              |                 |           |
| DE: Ammonia (NH <sub>3</sub> ) without CO <sub>2</sub> recovery Sphera                                 | Mass                         | 1.48E-01        | kg        |
| DE: Process steam from natural gas 85% Sphera                                                          | Energy                       | 1.16E+00        | MJ        |
| GLO: market for phosphoric acid, industrial grade, without water, in 85% solution stateecoinvent 3.7.1 | Mass                         | 1.00E+00        | kg        |
| DE: Electricity grid mix Sphera                                                                        | Energy (net calorific value) | 8.24E-01        | MJ        |
| Europe without Switzerland: market for tap waterecoinvent 3.7.1                                        | Mass                         | 1.00E+00        | kg        |
| <i>Output</i>                                                                                          |                              |                 |           |
| <b>Ammonium dihydrogen phosphate [(NH<sub>4</sub>)H<sub>2</sub>PO<sub>4</sub>] [Materials]</b>         | <b>Mass</b>                  | <b>1.00E+00</b> | <b>kg</b> |

Table S 22. LCI of Lithium acetate  $[Li(CH_3COO)*2 H_2O]$

| Flows                                                                                | Quantities                   | Amount          | Unit      |
|--------------------------------------------------------------------------------------|------------------------------|-----------------|-----------|
| <i>Input</i>                                                                         |                              |                 |           |
| GLO: lithium carbonate production, from concentrated brine ecoinvent 3.7.1           | Mass                         | 4.40E-01        | kg        |
| Europe without Switzerland: market for water, deionized ecoinvent 3.7.1              | Mass                         | 1.07E-01        | kg        |
| DE: Process steam from natural gas 85% Sphera                                        | Energy                       | 8.29E-01        | MJ        |
| DE: Acetic acid from methanol (low pressure carbonylation) (Monsanto process) Sphera | Mass                         | 7.15E-01        | kg        |
| DE: Electricity grid mix Sphera                                                      | Energy (net calorific value) | 7.52E-01        | MJ        |
| Europe without Switzerland: market for tap water ecoinvent 3.7.1                     | Mass                         | 7.15E-01        | kg        |
| <i>Output</i>                                                                        |                              |                 |           |
| <b>Lithium acetate <math>[Li(CH_3COO)*2 H_2O]</math> [Materials]</b>                 | <b>Mass</b>                  | <b>1.00E+00</b> | <b>kg</b> |
| Carbon dioxide [Inorganic emissions to air]                                          | Mass                         | 2.62E-01        | kg        |

Table S 23. LCI of titanium isopropoxide  $[Ti[OCH(CH_3)_2]_4]$

Credit is given to the ammonium chloride ( $NH_4Cl$ ) produced by the reaction of titanium tetrachloride ( $TiCl_4$ ) and ammonia ( $NH_3$ ). Therefore, the input is negative. This means that the environmental impact to produce 0.753 kg  $NH_4Cl$  is subtracted from the total balance.

| Flows                                                                     | Quantities  | Amount          | Unit      |
|---------------------------------------------------------------------------|-------------|-----------------|-----------|
| <i>Input</i>                                                              |             |                 |           |
| GLO: titanium tetrachloride production ecoinvent 3.7.1                    | Mass        | 6.67E-01        | kg        |
| DE: Isopropanol Sphera                                                    | Mass        | 8.46E-01        | kg        |
| DE: Ammonia ( $NH_3$ ) without $CO_2$ recovery Sphera                     | Mass        | 2.40E-01        | kg        |
| GLO: Ammonium chloride production ecoinvent 3.7.1                         | Mass        | -7.53E-01       | kg        |
| <i>Output</i>                                                             |             |                 |           |
| <b>Titanium isopropoxide <math>[Ti[OCH(CH_3)_2]_4]</math> [Materials]</b> | <b>Mass</b> | <b>1.00E+00</b> | <b>kg</b> |

## 10. Comparison of LAMP and LLZO with LiPF<sub>6</sub> (in EC/DMC)

Figure S 1 shows the environmental impacts of two model cells. Cell 1 consists of the mixed cathode (LAMP/NMC 622) and electrolyte (LLZO) while cell 2 consists of an equivalent quantity of LiPF<sub>6</sub> (in EC/DMC) that could theoretically replace LAMP and LLZO. To calculate the equivalent quantity of LiPF<sub>6</sub>, the densities of LAMP and LLZO are set in relation to the density of LiPF<sub>6</sub> (assumed densities: LLZO: 5.107 g/cm<sup>3</sup>, LAMP: 2.92 g/cm<sup>3</sup>, LiPF<sub>6</sub> in EC/DMC: 1.32 g/cm<sup>3</sup>). This results in the following quantities required for the model cells of 25.8 cm<sup>2</sup>: cell 1 consists of 0.132 g LLZO, 0.226 g LAMP, and 0.858 g NMC 622; cell 2 consists of 0.136 g LiPF<sub>6</sub> in EC/DMC (50/50) and 0.858 g NMC 622. The quantity of NMC 622 remains the same in the two cells. As expected, the overall environmental impacts are lower if the common LiPF<sub>6</sub> were used instead of LAMP and LLZO. However, most of the environmental impacts are caused by NMC 622, and those of LLZO are much lower. The overall performance of LAMP is similar to that of LiPF<sub>6</sub>.

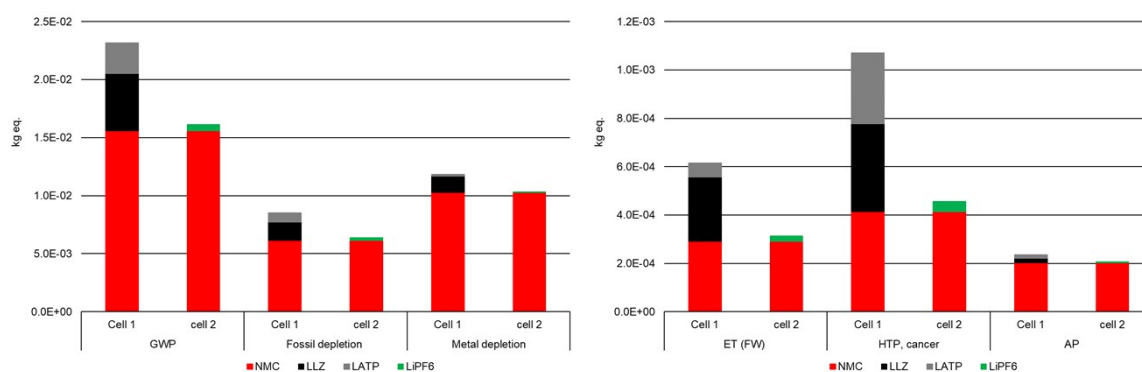

Figure S 1 Environmental impacts of cathode and electrolyte material supply required for two model cells (25 cm<sup>2</sup>): cell (1) includes 0.858 g NMC 622, 0.226 g LAMP, and 0.132 g LLZO; cell (2) includes 0.858 g NMC 622 and 0.136 g LiPF<sub>6</sub> in EC/DMC (50/50)

## 11. References

1. Deng, Y., et al., *Life cycle assessment of lithium sulfur battery for electric vehicles*. Journal of Power Sources, 2017. **343**: p. 284-295.
2. Sun, X., et al., *Life cycle assessment of lithium nickel cobalt manganese oxide (NMC) batteries for electric passenger vehicles*. Journal of Cleaner Production, 2020. **273**: p. 123006.
